# Supplementary material for: So, Who Likes You? Evidence from a Randomized Field Experiment
Source: Atypon-hosted journal article supplement (doi:10.1287/mnsc.2022.4576), 2022-11-02
Supplement: mnsc.2022.4576.sm1.pdf [file mnsc.2022.4576.sm1.pdf]

# So, Who Likes You?

## Evidence from a Randomized Field Experiment

### Online Appendix

#### Appendix A

**Table A1 – Model Selection Using Akaike information criterion (AIC)**

| AIC Calculation Across Models                                       | (1)<br><i>MatchesReceived</i> | (2)<br><i>MatchesSent</i> |
|---------------------------------------------------------------------|-------------------------------|---------------------------|
| (1) Female only NB Model for heterogeneity analysis by desirability |                               |                           |
| No. of Observations                                                 | 10218                         | 10218                     |
| No. of parameters                                                   | 45                            | 45                        |
| Log Likelihood                                                      | -16378.5558                   | -6996.1094                |
| AIC                                                                 | 32849.1117                    | 14084.2187                |
| (2) Male only NB Model for heterogeneity analysis by desirability   |                               |                           |
| No. of Observations                                                 | 24115                         | 24115                     |
| No. of parameters                                                   | 45                            | 45                        |
| Log Likelihood                                                      | -11252.3608                   | -24929.5167               |
| AIC                                                                 | 22596.7215                    | 49951.0335                |
| (3) Combined AIC from (1) and (2)                                   | 55441.8332                    | 64031.2522                |
| (4) Pooled NB Model for heterogeneity analysis by desirability      |                               |                           |
| No. of Observations                                                 | 34333                         | 34333                     |
| No. of parameters                                                   | 90                            | 90                        |
| Log Likelihood                                                      | -27658.4791                   | -31947.6538               |
| AIC                                                                 | 55498.9583                    | 64077.3076                |

Note: Combined AIC in (3) =  $-2 * (\log \text{likelihood in (1)} + \log \text{likelihood in (2)}) + 2 (\text{no. of parameter in (1)} + \text{no. of parameter in (2)})$ .

## Appendix B: SUTVA Corrected Models

**Table B1: Neighbors' Exposure to Treatment in the *ViewsSentPre* Network**

For Treated Focal Females (Sample size = 11,171) –

|        | Total No. of Neighbors | No. of Treated Neighbors | Percentage of Treated Neighbors =<br>$\left( \frac{\text{No. of Treated Neighbors}}{\text{Total No. of Neighbors}} * 100 \right)$ |
|--------|------------------------|--------------------------|-----------------------------------------------------------------------------------------------------------------------------------|
| Mean   | 55.25                  | 0.37                     | 1.01                                                                                                                              |
| Std.   | 109.13                 | 0.87                     | 5.21                                                                                                                              |
| Median | 21                     | 0                        | 0                                                                                                                                 |

For Treated Focal Males (Sample size = 28,549) –

|        | Total No. of Neighbors | No. of Treated Neighbors | Percentage of Treated Neighbors =<br>$\left( \frac{\text{No. of Treated Neighbors}}{\text{Total No. of Neighbors}} * 100 \right)$ |
|--------|------------------------|--------------------------|-----------------------------------------------------------------------------------------------------------------------------------|
| Mean   | 89.69                  | 0.50                     | 0.55                                                                                                                              |
| Std    | 197.74                 | 0.50                     | 1.36                                                                                                                              |
| Median | 26                     | 1                        | 0                                                                                                                                 |

Next, we use the more flexible regression adjustment following Chin (2019) to tackle the second order SUTVA violation scenario, where the treated and control group users are connected via a third person, with whom they each interact directly.

To calculate the correction term we:

1. **Construct the underlying directed networks for user engagement and matching behavior for the pre-treatment month.** To understand this network, let's consider the 'matches sent' network. Here, the nodes represent dating platform users, which include focal users (i.e., users who eventually become part of the experiment during the experiment month) and other users to whom focal users sent a match. Any directed edge in this network, say from node A to node B, represents a match sent from node A to node B.
2. **Calculate the correction term for each focal user.** In the matches sent network, the correction term is the proportion of the focal user's neighbors who have received matches from at least another user from a target cohort. Note that the target cohort of users depend on the focal user's cohort. For example, if the focal user belongs to the treated female cohort, then the target users belong to the control female cohort. In other words, at least one individual from the target cohort and the focal user have both sent matches to a common neighbor. We term such a neighbor as an infected neighbor. Therefore, the correction term is the total number of infected neighbors divided by the total number of neighbors for a focal user. Further, the correction term calculation here is the proportion of the treated female focal user's neighbors who have received matches from at least one control group female user, in the pre-treatment period. Mathematically:

$$SUTVA \text{ Violation Correction Term}_i = \frac{\sum_j \mathbf{Infected Neighbor}_{i,j}}{\sum_j \mathbf{Neighbor}_{i,j}}$$

$$\mathbf{Neighbor}_{i,j} = 1 \text{ if node } j \text{ is a neighbor of node } i;$$

$$0 \text{ otherwise}$$

$$\mathbf{Infected Neighbor}_{i,j}$$

$$= 1 \text{ if node } j \text{ is a neighbor of } i \text{ and node } j \text{'s neighbors contain at least one user from a target cohort;}$$

$$0 \text{ otherwise}$$

**3. Create histograms of the SUTVA violation correction term.** Here, we present histograms for the frequency distribution of the SUTVA violation correction term across six networks – views sent, views received, messages sent, messages received, matches sent, and matches received. Here, the x-axis is the value of the correction term (which is between 0 and 1), and the y-axis is the frequency (i.e., number of focal users).

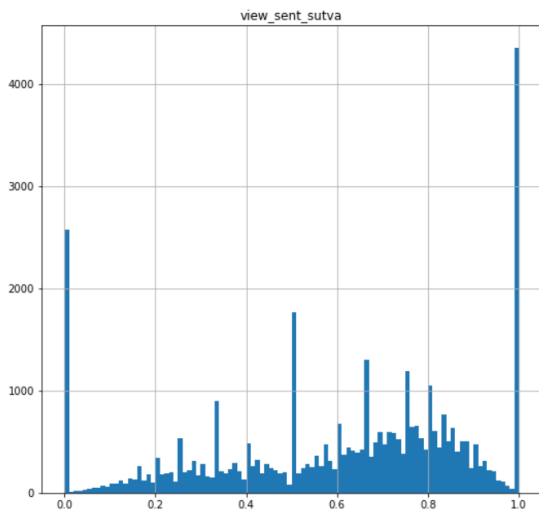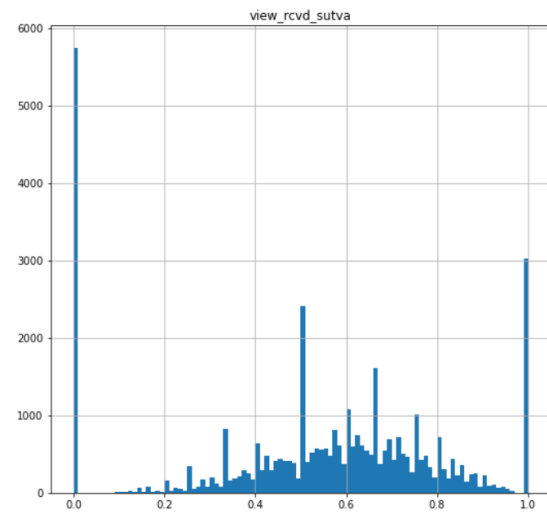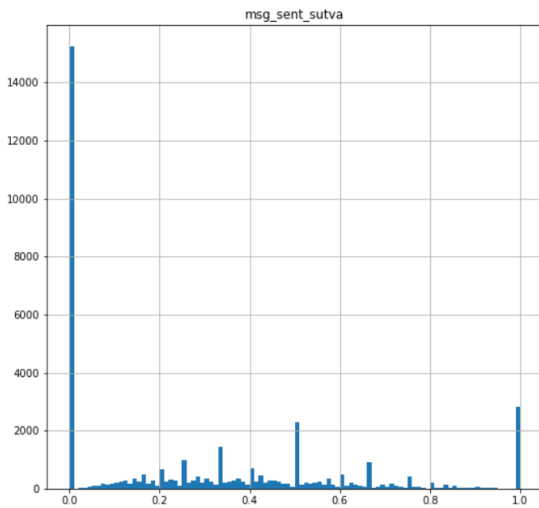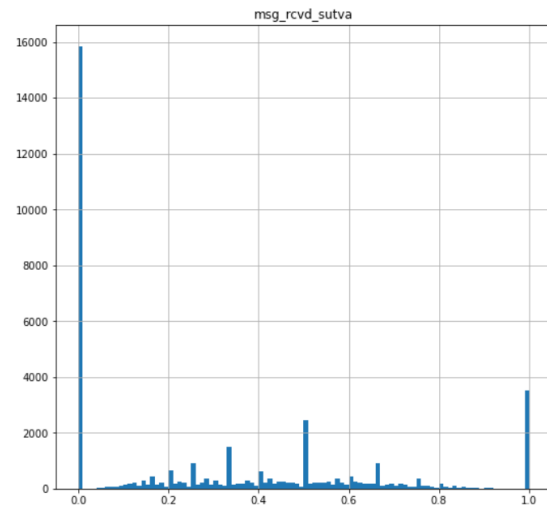

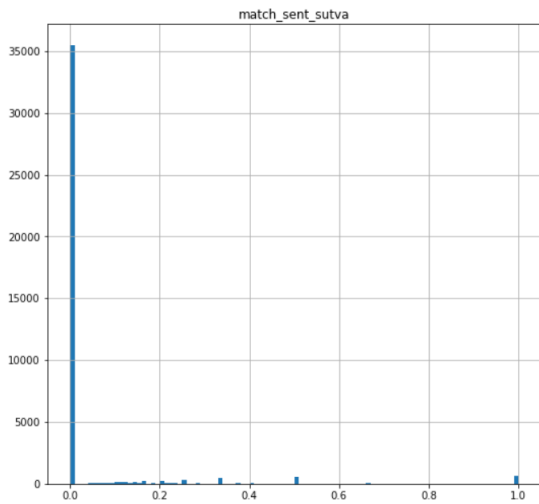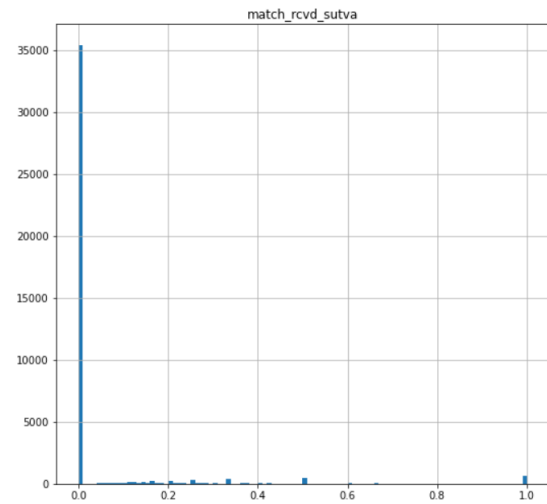

**4. Add correction terms in the regression models (as suggested by Chin 2019).** For example, if the dependent variable is match sent, then we use the corresponding correction term from the match sent network. Similarly, for other dependent variables, we use individual or multiple correction terms based on the networks involved for those analyses. This way, we deal with SUTVA violation in different contexts uniquely. For instance, the above figure clearly shows that SUTVA violation is very evident for views sent and views received networks, yet not that prominent for matches sent and matches received networks. So, we utilize the correction terms in our regressions as the context demands.

**Table B2 – Female: SUTVA Corrected NB Model for Basic Outcomes**

| VARIABLES                                 | (1)<br><i>ViewsReceived</i> | (2)<br><i>ViewsSent</i> | (3)<br><i>MessagesReceived</i> | (4)<br><i>MessagesSent</i> | (5)<br><i>MatchesReceived</i> | (6)<br><i>MatchesSent</i> |
|-------------------------------------------|-----------------------------|-------------------------|--------------------------------|----------------------------|-------------------------------|---------------------------|
| Treatment                                 | 0.0452*<br>(0.0250)         | 0.0978**<br>(0.0413)    | 0.0444<br>(0.0274)             | 0.0635<br>(0.0397)         | 0.1414***<br>(0.0428)         | 0.1305**<br>(0.0603)      |
| Control Variables                         |                             |                         |                                |                            |                               |                           |
| Age                                       | ✓                           | ✓                       | ✓                              | ✓                          | ✓                             | ✓                         |
| Body Types                                | ✓                           | ✓                       | ✓                              | ✓                          | ✓                             | ✓                         |
| Education                                 | ✓                           | ✓                       | ✓                              | ✓                          | ✓                             | ✓                         |
| Levels                                    |                             |                         |                                |                            |                               |                           |
| Ethnicities                               | ✓                           | ✓                       | ✓                              | ✓                          | ✓                             | ✓                         |
| Pre-treatment<br>activities (PC1<br>only) | ✓                           | ✓                       | ✓                              | ✓                          | ✓                             | ✓                         |
| SUTVA Correction<br>Term                  | 1.4994***<br>(0.0599)       | 0.0527<br>(0.0876)      | 1.0942***<br>(0.0538)          | 0.9088***<br>(0.0864)      | 0.9691***<br>(0.1006)         | 0.9727**<br>(0.3834)      |
| Constant Term                             | 3.2403***<br>(0.1077)       | 1.1976***<br>(0.1675)   | 2.0788***<br>(0.1127)          | 0.7910***<br>(0.1577)      | -0.0354<br>(0.1673)           | -1.7454***<br>(0.2259)    |
| Observations                              | 11171                       | 11171                   | 11171                          | 11171                      | 11171                         | 11171                     |

Robust standard errors in parentheses

\*\*\* p &lt; 0.01, \*\* p &lt; 0.05, \* p &lt; 0.1

**Table B3 – Male: SUTVA Corrected NB Model for Basic Outcomes**

| VARIABLES                                 | (1)<br><i>ViewsReceived</i> | (2)<br><i>ViewsSent</i> | (3)<br><i>MessagesReceived</i> | (4)<br><i>MessagesSent</i> | (5)<br><i>MatchesReceived</i> | (6)<br><i>MatchesSent</i> |
|-------------------------------------------|-----------------------------|-------------------------|--------------------------------|----------------------------|-------------------------------|---------------------------|
| Treatment                                 | 0.0265<br>(0.0180)          | 0.0436<br>(0.0278)      | 0.0718***<br>(0.0230)          | 0.0989***<br>(0.0299)      | 0.1348***<br>(0.0414)         | 0.1101***<br>(0.0332)     |
| Control Variables                         |                             |                         |                                |                            |                               |                           |
| Age                                       | ✓                           | ✓                       | ✓                              | ✓                          | ✓                             | ✓                         |
| Body Types                                | ✓                           | ✓                       | ✓                              | ✓                          | ✓                             | ✓                         |
| Education                                 | ✓                           | ✓                       | ✓                              | ✓                          | ✓                             | ✓                         |
| Levels                                    |                             |                         |                                |                            |                               |                           |
| Ethnicities                               | ✓                           | ✓                       | ✓                              | ✓                          | ✓                             | ✓                         |
| Pre-treatment<br>activities (PC1<br>only) | ✓                           | ✓                       | ✓                              | ✓                          | ✓                             | ✓                         |
| SUTVA Correction<br>Term                  | 1.0801***<br>(0.0311)       | 0.5002***<br>(0.0634)   | 0.2913***<br>(0.0362)          | 1.4540***<br>(0.0468)      | 0.5680***<br>(0.1396)         | 0.8573***<br>(0.0888)     |
| Constant Term                             | 0.3205***<br>(0.0774)       | 2.5034***<br>(0.1277)   | -0.1766*<br>(0.0950)           | 0.8983***<br>(0.1265)      | -2.7707***<br>(0.1639)        | -0.8732***<br>(0.1359)    |
| Observations                              | 28549                       | 28549                   | 28549                          | 28549                      | 28549                         | 28549                     |

Robust standard errors in parentheses

\*\*\* p &lt; 0.01, \*\* p &lt; 0.05, \* p &lt; 0.1

**Table B4 – Female: SUTVA Corrected NB Model for Advanced Outcomes**

| VARIABLES                | (1)<br><i>VoteViewsSent</i> | (2)<br><i>VoteViewMessagesReceived</i> |
|--------------------------|-----------------------------|----------------------------------------|
| Treatment                | 0.0944**<br>(0.0425)        | 0.0939**<br>(0.0386)                   |
| Control Variables        |                             |                                        |
| Age                      | ✓                           | ✓                                      |
| Body Types               | ✓                           | ✓                                      |
| Education Levels         | ✓                           | ✓                                      |
| Ethnicities              | ✓                           | ✓                                      |
| Pre-treatment activities | ✓                           | ✓                                      |
| (PC1 only)               |                             |                                        |
| SUTVA Correction Terms   | ✓                           | ✓                                      |
| Constant Term            | 1.9474***<br>(0.1723)       | 0.0881<br>(0.1580)                     |
| Observations             | 11171                       | 11171                                  |

Robust standard errors in parentheses

\*\*\*  $p < 0.01$ , \*\*  $p < 0.05$ , \*  $p < 0.1$

**Table B5 – Male: SUTVA Corrected NB Model for Advanced Outcomes**

| VARIABLES                              | (1)<br><i>VoteViewsSent</i> | (2)<br><i>VoteViewMessagesReceived</i> |
|----------------------------------------|-----------------------------|----------------------------------------|
| Treatment                              | 0.0634**<br>(0.0299)        | 0.0884***<br>(0.0283)                  |
| Control Variables                      |                             |                                        |
| Age                                    | ✓                           | ✓                                      |
| Body Types                             | ✓                           | ✓                                      |
| Education Levels                       | ✓                           | ✓                                      |
| Ethnicities                            | ✓                           | ✓                                      |
| Pre-treatment activities<br>(PC1 only) | ✓                           | ✓                                      |
| SUTVA Correction Terms                 | ✓                           | ✓                                      |
| Constant Term                          | 2.5606***<br>(0.1375)       | -0.4838***<br>(0.1303)                 |
| Observations                           | 28549                       | 28549                                  |

Robust standard errors in parentheses

\*\*\* p < 0.01, \*\* p < 0.05, \* p < 0.1

**Table B6 – Female: SUTVA Corrected NB Models for Match Efficiency and Time to Match Outcomes**

| VARIABLES                | (1)                                        | (2)                                | (3)                          | (4)                      |
|--------------------------|--------------------------------------------|------------------------------------|------------------------------|--------------------------|
|                          | $\frac{MatchesReceived}{MessagesReceived}$ | $\frac{MatchesSent}{MessagesSent}$ | Time to first match received | Time to first match sent |
| Treatment                | 0.0079***<br>(0.0027)                      | 0.0055<br>(0.0037)                 | 0.1138***<br>(0.0340)        | 0.0495<br>(0.0519)       |
| Control Variables        |                                            |                                    |                              |                          |
| Age                      | ✓                                          | ✓                                  | ✓                            | ✓                        |
| Body Types               | ✓                                          | ✓                                  | ✓                            | ✓                        |
| Education Levels         | ✓                                          | ✓                                  | ✓                            | ✓                        |
| Ethnicities              | ✓                                          | ✓                                  | ✓                            | ✓                        |
| Pre-treatment activities | ✓                                          | ✓                                  | ✓                            | ✓                        |
| (PC1 only)               |                                            |                                    |                              |                          |
| SUTVA Correction Terms   | ✓                                          | ✓                                  | ✓                            | ✓                        |
| Constant Term            | 0.0647***<br>(0.0110)                      | 0.0319**<br>(0.0137)               |                              |                          |
| Observations             | 8,462                                      | 4,889                              | 10,218                       | 10,218                   |

**Note.** Models (1) and (2) uses ordinary least square regression, while Models (3) and (4) uses Cox-Proportional Hazard model. Robust standard errors in parentheses.

\*\*\* p < 0.01, \*\* p < 0.05, \* p < 0.1

**Table B7 – Male: SUTVA Corrected NB Models for Match Efficiency and Time to Match Outcomes**

| VARIABLES                | (1)                                        | (2)                                | (3)                          | (4)                      |
|--------------------------|--------------------------------------------|------------------------------------|------------------------------|--------------------------|
|                          | $\frac{MatchesReceived}{MessagesReceived}$ | $\frac{MatchesSent}{MessagesSent}$ | Time to first match received | Time to first match sent |
| Treatment                | 0.0034<br>(0.0032)                         | 0.0020<br>(0.0031)                 | 0.1356***<br>(0.0385)        | 0.0902***<br>(0.0270)    |
| Control Variables        |                                            |                                    |                              |                          |
| Age                      | ✓                                          | ✓                                  | ✓                            | ✓                        |
| Body Types               | ✓                                          | ✓                                  | ✓                            | ✓                        |
| Education Levels         | ✓                                          | ✓                                  | ✓                            | ✓                        |
| Ethnicities              | ✓                                          | ✓                                  | ✓                            | ✓                        |
| Pre-treatment activities | ✓                                          | ✓                                  | ✓                            | ✓                        |
| (PC1 only)               |                                            |                                    |                              |                          |
| SUTVA Correction Terms   | ✓                                          | ✓                                  | ✓                            | ✓                        |
| Constant Term            | 0.0823***<br>(0.0126)                      | 0.1035***<br>(0.0127)              |                              |                          |
| Observations             | 11,682                                     | 11,522                             | 24,115                       | 24,115                   |

**Note.** Models (1) and (2) uses ordinary least square regression, while Models (3) and (4) uses Cox-Proportional Hazard model. Robust standard errors in parentheses.

\*\*\* p < 0.01, \*\* p < 0.05, \* p < 0.1

**Table B8 – Female: SUTVA Corrected NB Model for Heterogeneity Analysis by Desirability**

| VARIABLES                                                                                    | (1)<br><i>MatchesReceived</i> | (2)<br><i>MatchesSent</i> |
|----------------------------------------------------------------------------------------------|-------------------------------|---------------------------|
| (1) Treatment                                                                                | 0.4638***<br>(0.1595)         | 0.8603***<br>(0.2676)     |
| (2) Focal User’s Desirability (High)                                                         | 0.9804***<br>(0.1449)         | 0.6419***<br>(0.2444)     |
| (3) Focal User’s Desirability (Medium)                                                       | 0.9480***<br>(0.1468)         | 1.0644***<br>(0.2493)     |
| (4) Targeting Users’ Desirability (High)                                                     | -0.0460<br>(0.1575)           | 0.9104***<br>(0.2539)     |
| (5) Targeting Users’ Desirability (Medium)                                                   | 0.3906**<br>(0.1709)          | 0.2310<br>(0.3106)        |
| (6) Focal User’s Desirability (High) ★ Targeting Users’ Desirability (High)                  | 0.1415<br>(0.1981)            | -0.5636*<br>(0.3011)      |
| (7) Focal User’s Desirability (Medium) ★ Targeting Users’ Desirability (High)                | -0.1151<br>(0.2003)           | -1.0687***<br>(0.3107)    |
| (8) Focal User’s Desirability (High) ★ Targeting Users’ Desirability (Medium)                | -0.3489*<br>(0.2041)          | -0.1956<br>(0.3471)       |
| (9) Focal User’s Desirability (Medium) ★ Targeting Users’ Desirability (Medium)              | -0.4110*<br>(0.2103)          | -0.3562<br>(0.3590)       |
| (10) Treatment ★ Focal User’s Desirability (High)                                            | -0.3262*<br>(0.1951)          | -0.6954**<br>(0.3099)     |
| (11) Treatment ★ Focal User’s Desirability (Medium)                                          | -0.6584***<br>(0.2043)        | -1.1806***<br>(0.3303)    |
| (12) Treatment ★ Targeting Users’ Desirability (High)                                        | 0.1888<br>(0.2146)            | -1.0081***<br>(0.3376)    |
| (13) Treatment ★ Targeting Users’ Desirability (Medium)                                      | -0.5215**<br>(0.2400)         | -0.4754<br>(0.4057)       |
| (14) Treatment ★ Focal User’s Desirability (High) ★ Targeting Users’ Desirability (High)     | -0.3530<br>(0.2721)           | 0.8454**<br>(0.4049)      |
| (15) Treatment ★ Focal User’s Desirability (Medium) ★ Targeting Users’ Desirability (High)   | 0.2132<br>(0.2762)            | 1.4357***<br>(0.4234)     |
| (16) Treatment ★ Focal User’s Desirability (High) ★ Targeting Users’ Desirability (Medium)   | 0.4514<br>(0.2859)            | 0.4811<br>(0.4585)        |
| (17) Treatment ★ Focal User’s Desirability (Medium) ★ Targeting Users’ Desirability (Medium) | 0.9497***<br>(0.2956)         | 1.1442**<br>(0.4795)      |
| (18) Constant Term                                                                           | -0.8471***<br>(0.1989)        | -2.5765***<br>(0.3077)    |
| Control Variables –                                                                          |                               |                           |
| Age, Body Types, Education Levels, Ethnicities                                               | ✓                             | ✓                         |
| Pre-treatment activities (PC1 only)                                                          | ✓                             | ✓                         |
| SUTVA correction term                                                                        | ✓                             | ✓                         |
| Observations                                                                                 | 10218                         | 10218                     |

Robust standard errors in parentheses

\*\*\* p < 0.01, \*\* p < 0.05, \* p < 0.1

**Table B9 – Male: SUTVA Corrected NB Model for Heterogeneity Analysis by Desirability**

| VARIABLES                                                                                    | (1)<br><i>MatchesReceived</i> | (2)<br><i>MatchesSent</i> |
|----------------------------------------------------------------------------------------------|-------------------------------|---------------------------|
| (1) Treatment                                                                                | 0.5404**<br>(0.2298)          | 0.1270<br>(0.1253)        |
| (2) Focal User’s Desirability (High)                                                         | 1.8963***<br>(0.1969)         | 1.7529***<br>(0.1114)     |
| (3) Focal User’s Desirability (Medium)                                                       | 1.0765***<br>(0.2074)         | 0.5300***<br>(0.1149)     |
| (4) Targeting Users’ Desirability (High)                                                     | 0.0051<br>(0.2657)            | -0.5721***<br>(0.1495)    |
| (5) Targeting Users’ Desirability (Medium)                                                   | 0.3274<br>(0.2606)            | -0.2453<br>(0.1494)       |
| (6) Focal User’s Desirability (High) ✱ Targeting Users’ Desirability (High)                  | 0.1545<br>(0.2814)            | 0.5436***<br>(0.1699)     |
| (7) Focal User’s Desirability (Medium) ✱ Targeting Users’ Desirability (High)                | -0.2896<br>(0.3059)           | 0.4679***<br>(0.1810)     |
| (8) Focal User’s Desirability (High) ✱ Targeting Users’ Desirability (Medium)                | -0.1401<br>(0.2750)           | 0.1171<br>(0.1681)        |
| (9) Focal User’s Desirability (Medium) ✱ Targeting Users’ Desirability (Medium)              | -0.2187<br>(0.2960)           | 0.2941<br>(0.1804)        |
| (10) Treatment ✱ Focal User’s Desirability (High)                                            | -0.3644<br>(0.2498)           | -0.0233<br>(0.1516)       |
| (11) Treatment ✱ Focal User’s Desirability (Medium)                                          | -0.5543**<br>(0.2682)         | -0.1806<br>(0.1591)       |
| (12) Treatment ✱ Targeting Users’ Desirability (High)                                        | -0.3052<br>(0.3464)           | 0.3059<br>(0.2001)        |
| (13) Treatment ✱ Targeting Users’ Desirability (Medium)                                      | -0.3631<br>(0.3433)           | -0.0336<br>(0.2075)       |
| (14) Treatment ✱ Focal User’s Desirability (High) ✱ Targeting Users’ Desirability (High)     | 0.1433<br>(0.3694)            | -0.3972*<br>(0.2300)      |
| (15) Treatment ✱ Focal User’s Desirability (Medium) ✱ Targeting Users’ Desirability (High)   | 0.5488<br>(0.4042)            | 0.0125<br>(0.2453)        |
| (16) Treatment ✱ Focal User’s Desirability (High) ✱ Targeting Users’ Desirability (Medium)   | 0.3958<br>(0.3643)            | 0.0811<br>(0.2344)        |
| (17) Treatment ✱ Focal User’s Desirability (Medium) ✱ Targeting Users’ Desirability (Medium) | 0.3356<br>(0.3970)            | 0.0901<br>(0.2521)        |
| (18) Constant Term                                                                           | -3.9816***<br>(0.2378)        | -1.6514***<br>(0.1557)    |
| <hr/>                                                                                        |                               |                           |
| Control Variables –                                                                          |                               |                           |
| Age, Body Types, Education Levels, Ethnicities                                               | ✓                             | ✓                         |
| Pre-treatment activities (PC1 only)                                                          | ✓                             | ✓                         |
| SUTVA Correction term                                                                        | ✓                             | ✓                         |
| <hr/>                                                                                        |                               |                           |
| Observations                                                                                 | 24115                         | 24115                     |

Robust standard errors in parentheses

\*\*\* p < 0.01, \*\* p < 0.05, \* p < 0.1

**Table B10 – Female: SUTVA Corrected NB Model for Robustness Related Outcomes**

| TIME FRAMES                               | (1)                   | (2)                   | (3)                   | (4)                   | (5)                   | (6)                   | (7)                   |
|-------------------------------------------|-----------------------|-----------------------|-----------------------|-----------------------|-----------------------|-----------------------|-----------------------|
|                                           | Monthly Level         |                       | Weekly Level          |                       |                       |                       |                       |
|                                           | Month 2               | Month 3               | Month 2<br>Week 1     | Month 2<br>Week 2     | Month 2<br>Week 3     | Month 2<br>Week 4     | Month 3<br>Week 1     |
| Treatment                                 | 0.1414***<br>(0.0428) | 0.0428<br>(0.0513)    | 0.1664***<br>(0.0494) | 0.1100**<br>(0.0533)  | 0.0938*<br>(0.0556)   | 0.1477**<br>(0.0577)  | -0.0327<br>(0.0598)   |
| Control Variables                         |                       |                       |                       |                       |                       |                       |                       |
| Age                                       | ✓                     | ✓                     | ✓                     | ✓                     | ✓                     | ✓                     | ✓                     |
| Body Types                                | ✓                     | ✓                     | ✓                     | ✓                     | ✓                     | ✓                     | ✓                     |
| Education                                 | ✓                     | ✓                     | ✓                     | ✓                     | ✓                     | ✓                     | ✓                     |
| Levels                                    |                       |                       |                       |                       |                       |                       |                       |
| Ethnicities                               | ✓                     | ✓                     | ✓                     | ✓                     | ✓                     | ✓                     | ✓                     |
| Pre-treatment<br>activities (PC1<br>only) | ✓                     | ✓                     | ✓                     | ✓                     | ✓                     | ✓                     | ✓                     |
| SUTVA<br>Correction Term                  | 0.9691***<br>(0.1006) | 1.0017***<br>(0.1215) | 1.1049***<br>(0.1104) | 0.8729***<br>(0.1218) | 0.7851***<br>(0.1281) | 0.8407***<br>(0.1324) | 0.9689***<br>(0.1362) |
| Constant Term                             | -0.0354<br>(0.1673)   | -0.0827<br>(0.2016)   | -<br>(0.1866)         | -<br>(0.2024)         | -<br>(0.2118)         | -<br>(0.2205)         | -<br>(0.2293)         |
| Observations                              | 11171                 | 11171                 | 11171                 | 11171                 | 11171                 | 11171                 | 11171                 |

**Notes.** Month 2 is the experiment month, and Month 3 is the post-experiment month. The dependent variable for columns (1) to (7) is MatchesReceived. Robust standard errors in parentheses.

\*\*\* p < 0.01, \*\* p < 0.05, \* p < 0.1

**Table B11 – Male: SUTVA Corrected NB Model for Robustness Related Outcomes**

| TIME FRAMES                            | (1)                        | (2)                        | (3)                        | (4)                        | (5)                        | (6)                        | (7)                        |
|----------------------------------------|----------------------------|----------------------------|----------------------------|----------------------------|----------------------------|----------------------------|----------------------------|
|                                        | Monthly Level              |                            | Weekly Level               |                            |                            |                            |                            |
|                                        | Month 2                    | Month 3                    | Month 2<br>Week 1          | Month 2<br>Week 2          | Month 2<br>Week 3          | Month 2<br>Week 4          | Month 3<br>Week 1          |
| Treatment                              | 0.1348***<br>(0.0414)      | 0.0290<br>(0.0465)         | 0.1403**<br>(0.0636)       | 0.1820***<br>(0.0671)      | 0.1831***<br>(0.0710)      | 0.0123<br>(0.0724)         | 0.0789<br>(0.0739)         |
| Control Variables                      |                            |                            |                            |                            |                            |                            |                            |
| Age                                    | ✓                          | ✓                          | ✓                          | ✓                          | ✓                          | ✓                          | ✓                          |
| Body Types                             | ✓                          | ✓                          | ✓                          | ✓                          | ✓                          | ✓                          | ✓                          |
| Education Levels                       | ✓                          | ✓                          | ✓                          | ✓                          | ✓                          | ✓                          | ✓                          |
| Ethnicities                            | ✓                          | ✓                          | ✓                          | ✓                          | ✓                          | ✓                          | ✓                          |
| Pre-treatment<br>activities (PC1 only) | ✓                          | ✓                          | ✓                          | ✓                          | ✓                          | ✓                          | ✓                          |
| SUTVA Correction<br>Term               | 0.5680***<br>(0.1396)      | 0.6231***<br>(0.1566)      | 0.6236***<br>(0.2015)      | 0.7200***<br>(0.2065)      | 0.5947***<br>(0.2271)      | 0.5790**<br>(0.2323)       | 0.5575**<br>(0.2384)       |
| Constant Term                          | -<br>2.7707***<br>(0.1639) | -<br>2.9239***<br>(0.1816) | -<br>4.1480***<br>(0.2565) | -<br>4.1010***<br>(0.2659) | -<br>4.4223***<br>(0.2853) | -<br>3.8127***<br>(0.2772) | -<br>4.0813***<br>(0.2829) |
| Observations                           | 28549                      | 28549                      | 28549                      | 28549                      | 28549                      | 28549                      | 28549                      |

**Notes.** Month 2 is the experiment month, and Month 3 is the post-experiment month. The dependent variable for columns (1) to (7) is MatchesReceived. Robust standard errors in parentheses.

\*\*\*  $p < 0.01$ , \*\*  $p < 0.05$ , \*  $p < 0.1$
